# Supplementary material
Source: PubMed Central journal article supplement (PMC3247962)
Supplement: supp_M111.309351_jbc.M111.309351-1.pdf [file supp_M111.309351_jbc.M111.309351-1.pdf]

## Probing the origin of the metabolic precursor of the CO ligand in the catalytic center of [NiFe]-hydrogenase

Ingmar Bürstel<sup>1</sup>, Philipp Hummel<sup>2</sup>, Elisabeth Siebert<sup>2</sup>, Nattawadee Wisitruangsakul<sup>2</sup>, Ingo Zebger<sup>2</sup>, Bärbel Friedrich<sup>1</sup>, and Oliver Lenz<sup>1</sup>

<sup>1</sup>Humboldt-Universität zu Berlin, Institut für Biologie/Mikrobiologie, Chausseestraße 117, 10115 Berlin, Germany.

<sup>2</sup>Technische Universität Berlin, Max-Volmer-Laboratorium, Straße des 17. Juni 135, 10623 Berlin, Germany.

### Supplemental Data

#### Table of content

**Page S-1 - SUPPLEMENTAL FIGURE S1. FTIR spectroscopic analysis of the regulatory [NiFe]-hydrogenase purified from cells grown heterotrophically on fructose and differentially labeled glycerol.**

**Page S-2 - SUPPLEMENTAL FIGURE S2. CO-mediated reduction of PdCl<sub>2</sub> resulting in the formation of metallic Pd.**

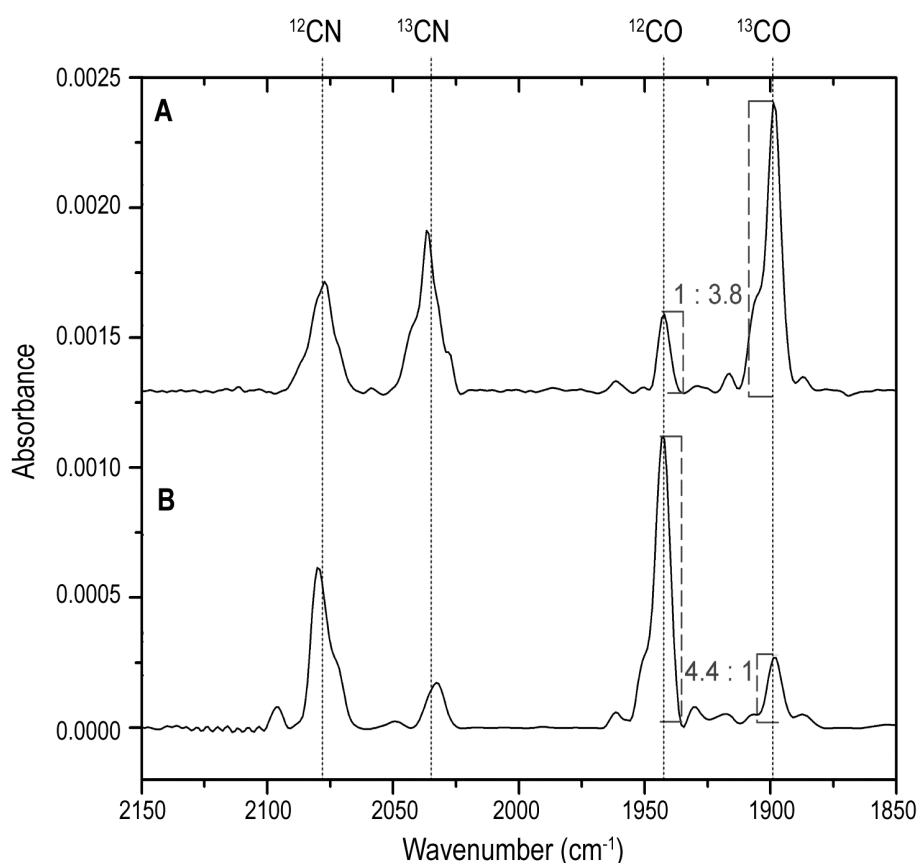

**SUPPLEMENTAL FIGURE S1. FTIR spectroscopic analysis of the regulatory [NiFe]-hydrogenase purified from cells grown heterotrophically on fructose and differentially labeled glycerol.** The following substrates were used: *A*, <sup>12</sup>C<sub>6</sub>-fructose and 1,3-<sup>13</sup>C<sub>2</sub>-glycerol; *B*, <sup>12</sup>C<sub>6</sub>-fructose and 2-<sup>13</sup>C-glycerol. Hatched lines indicate the  $\nu(\text{CN})$  and  $\nu(\text{CO})$  vibrational modes. Bands at wavenumbers 2080 cm<sup>-1</sup> and 2072 cm<sup>-1</sup> are attributed to the <sup>12</sup>CN<sup>-</sup> ligands and the absorption at 1943 cm<sup>-1</sup> to the <sup>12</sup>CO ligand. Incorporation of the <sup>13</sup>C atom leads to specific band shifts to 2038 cm<sup>-1</sup> and 2027 cm<sup>-1</sup> of the CN<sup>-</sup> ligands and to 1899 cm<sup>-1</sup> of the CO ligand.

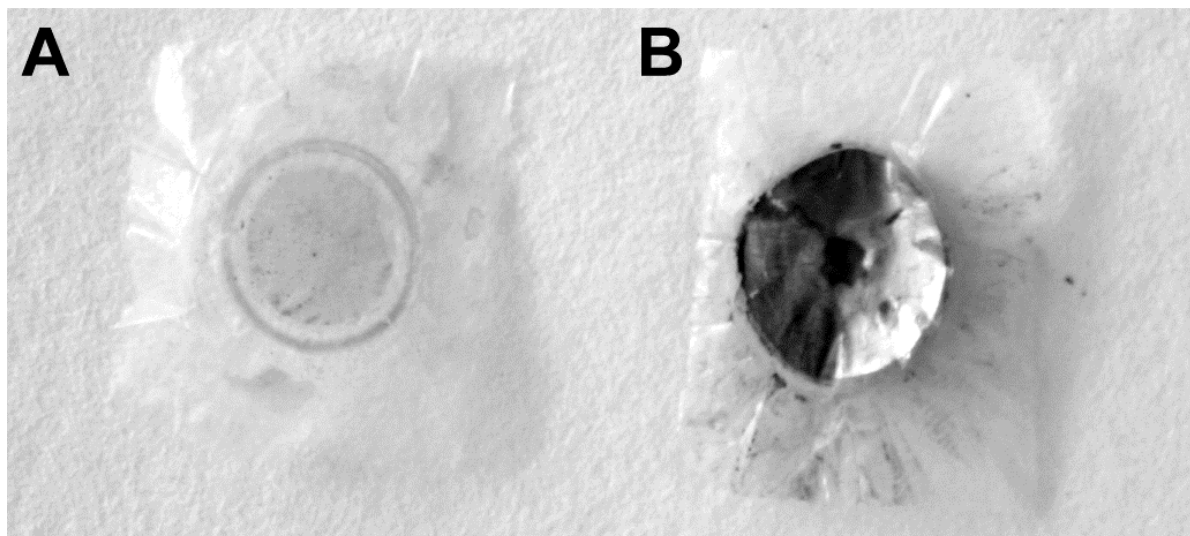

**SUPPLEMENTAL FIGURE S2. CO-mediated reduction of PdCl<sub>2</sub> resulting in the formation of metallic Pd.** Palladium(II)chloride-filled capsules sealed with a gas-permeable membrane were deposited in *R. eutropha* cell cultures growing heterotrophically (A) in minimal medium with fructose-glycerol, or lithoautotrophically (B) on H<sub>2</sub> and CO<sub>2</sub>. The capsules were removed after a cultivation time of 35 h and the membrane was analyzed for the precipitation of metallic palladium.
